# Supplementary material for: Synergistic effect of morphology evolution with oxygen vacancies on layered cathodes derived from polyoxovanadates for aqueous zinc-ion batteries
Source: Royal Society of Chemistry journal article supplement (doi:10.1039/d5ta02303c), 2025-01-01
Supplement: d5ta02303c1.pdf [file d5ta02303c1.pdf]

## *Supplementary Information for*

### **Synergistic effect of morphology evolution with oxygen vacancies on layered cathode derived from polyoxovanadates for aqueous zinc-ion batteries**

Yu-Ying Yang<sup>a, 1</sup>, Si-Yu Chen<sup>a, 1</sup>, Yong-Jia Ding<sup>a</sup>, Yun-Xiang Zhou<sup>a</sup>, Huan He<sup>a</sup>, Qiaoji Zheng<sup>a</sup>, Rui Zhang<sup>b,\*</sup>, Dunmin Lin<sup>a</sup>, Yu Huo<sup>a,c\*</sup>

<sup>a</sup> College of Chemistry and Materials Science, Sichuan Normal University, Chengdu 610066, P. R. China

<sup>b</sup> School of Chemical and Environmental Engineering, Shanghai Institute of Technology, Shanghai, 201418, PR China

<sup>c</sup> Key Laboratory of Advanced Energy Materials Chemistry (Ministry of Education), Nankai University, Tianjin 300071, China

<sup>1</sup> These authors contributed equally to this work.

#### **Contents:**

|                                     |    |
|-------------------------------------|----|
| 1. Experimental Section .....       | 2  |
| 1.1 Materials and methods .....     | 2  |
| 1.2 Synthesis .....                 | 2  |
| 1.3 Electrochemical tests .....     | 3  |
| 2. Supplementary Measurement.....   | 4  |
| 3. Theoretical calculations .....   | 9  |
| 4. Zinc ion storage mechanism ..... | 11 |
| References.....                     | 13 |

# 1. Experimental Section

## 1.1 Materials and methods

V<sub>2</sub>O<sub>5</sub> (99%), (N<sub>2</sub>H<sub>5</sub>)<sub>2</sub>SO<sub>4</sub> (99.5%), FeSO<sub>4</sub>·7H<sub>2</sub>O (99%) and Zn(CF<sub>3</sub>SO<sub>3</sub>)<sub>2</sub> (98.0%) were purchased from Shanghai Macklin Biochemical Technology. LiOH·H<sub>2</sub>O (99%), HCl (36%), N-methylpyrrolidone (NMP, 99.9%), ethanol, and polyvinylidene fluoride (PVDF) were all obtained from National Medicine Chemical Reagent Co, Ltd. Single-layer graphene oxide (flake diameter: 0.5-5 μm, thickness: 0.8-1.2 nm, Xianfeng Nanotechnology Co., Ltd, China).

X-ray diffraction powder pattern (XRD) was obtained on a Miliflex diffractometer with Cu-Kα radiation ( $\lambda = 1.54 \text{ \AA}$ ) and recorded in the range of 5-60° with a scanning rate of 6° min<sup>-1</sup>. The Raman scattering spectra were acquired on a Renishaw InVia system (532 nm Laser). The specific surface area and pore property of samples were obtained by the multipoint Brunauer- Emmett-Teller (BET, ASAP2020HD8 Surface Area and Porosity Analyzer) analysis based on the N<sub>2</sub> adsorption-desorption isotherms principle. X-ray photoelectron spectroscopy (XPS, ESCALAB Xi) was gained with an Al-Kα radiation source. The electron paramagnetic resonance (EPR) spectrum was obtained using Bruker EMXplus. The morphology and microstructure of the samples were analyzed by scanning electron microscopy (SEM, Zeiss/sigma 500) and transmission electron microscopy (TEM, JEOL JEM-2100 F).

## 1.2 Synthesis

### 1.2.1. Synthesis of [Fe<sub>3</sub>V<sub>18</sub>O<sub>42</sub>(H<sub>2</sub>O)<sub>12</sub>(VO<sub>4</sub>)]·24H<sub>2</sub>O (Fe<sub>3</sub>V<sub>18</sub>)

Fe<sub>3</sub>V<sub>18</sub> was synthesized based on literature [1]. V<sub>2</sub>O<sub>5</sub> (5.4564 g, 0.03 mol) was dissolved in distilled water (160 mL) and heated to 85 °C, and then the solution (36 mL) containing

LiOH·H<sub>2</sub>O solution (2.5176 g, 0.06 mol) and (N<sub>2</sub>H<sub>5</sub>)<sub>2</sub>SO<sub>4</sub> (3.9036 g, 0.03 mol) was added. Subsequently, the resulting solution was diluted to 300 mL and then the pH was adjusted to 4.6 with 2 M HCl. After that, FeSO<sub>4</sub>·7H<sub>2</sub>O (4.1703 g, 0.015 mol) was added to the above solution and stirred for 5 h. The final crystalline product was obtained by slow evaporation at room temperature after 12 h.

### 1.2.2. Synthesis of [Fe<sub>5</sub>V<sub>15</sub>O<sub>39</sub>(OH)<sub>9</sub>]·9H<sub>2</sub>O (FeVO)

GO (0.02 g) was ultrasonically dispersed in distilled water, and the solution (60 mL) with Fe<sub>3</sub>V<sub>18</sub> precursor (0.252 g) was added dropwise. The resulting suspension was transferred to a 100 mL Teflon-lined autoclave and maintained at 180 °C for 24 h. After cooling to room temperature, the black FeVO-R was obtained.

As a comparison, FeVO-B was synthesized under the same conditions without adding GO.

## 1.3 Electrochemical tests

The cathode slurry was prepared by mixing the active materials, acetylene black, and PVDF binder in a moderate amount of NMP solvent at a mass ratio of 7:2:1, then the obtained slurry was coated on titanium foil (2 mm) with a mass loading of 1 mg cm<sup>-2</sup> and dried in a vacuum oven at 60 °C for 12 h. The button cells (CR2032) were assembled in air using zinc foil as the anode, 2 M Zn(CF<sub>3</sub>SO<sub>3</sub>)<sub>2</sub> as electrolyte, and glass fiber as separator. Constant current charge-discharge tests were executed on a LAND CT2100A battery testing system in the voltage range of 0.2-1.6 V. The cyclic voltammetry curves (CV) and electrochemical impedance spectroscopy (EIS) were performed on the CHI 760E electrochemical workstation. The Galvanostatic intermittent titration technique (GITT) was performed at 0.1 A g<sup>-1</sup> with a constant current charge of 5 min and the relaxation of 10 min, severally.

## 2. Supplementary Measurement

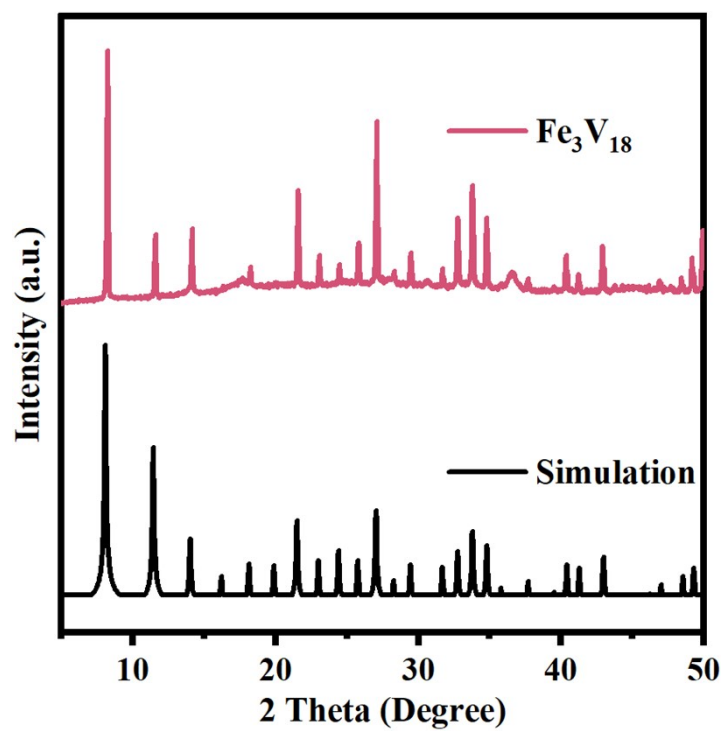

**Figure S1.** Experimental and simulated X-ray powder diffraction patterns for  $\text{Fe}_3\text{V}_{18}$ .

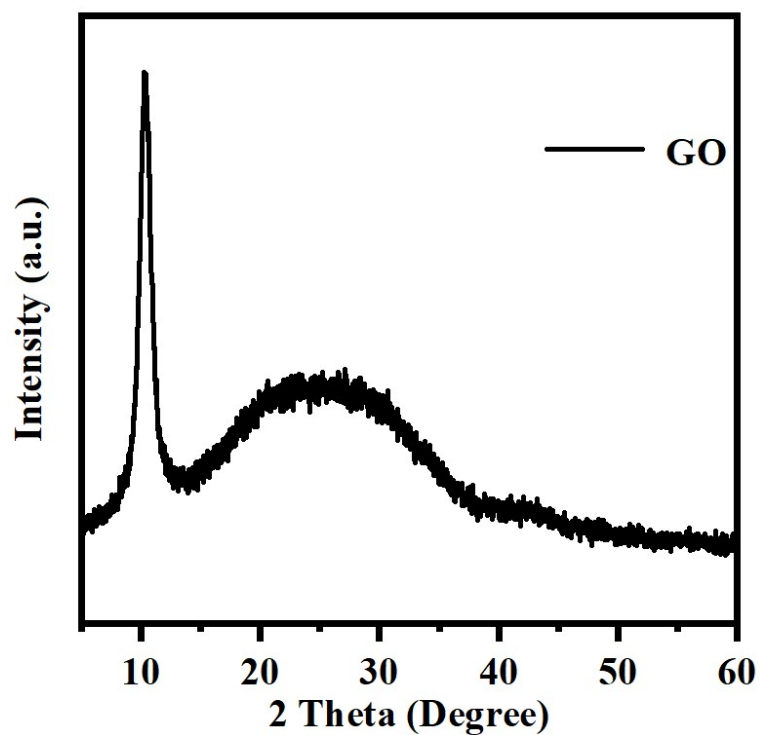

**Figure S2.** X-ray powder diffraction patterns for GO.

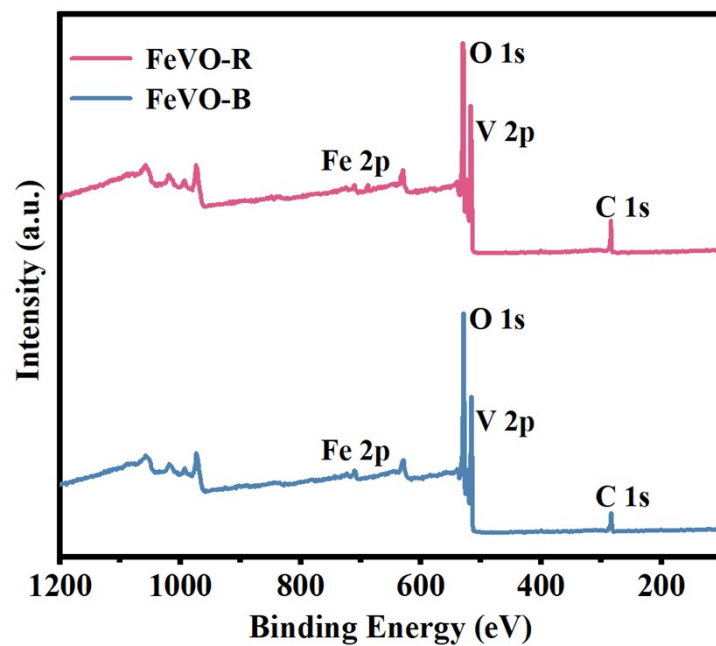

**Figure S3.** XPS survey spectra of FeVO-R and FeVO-B.

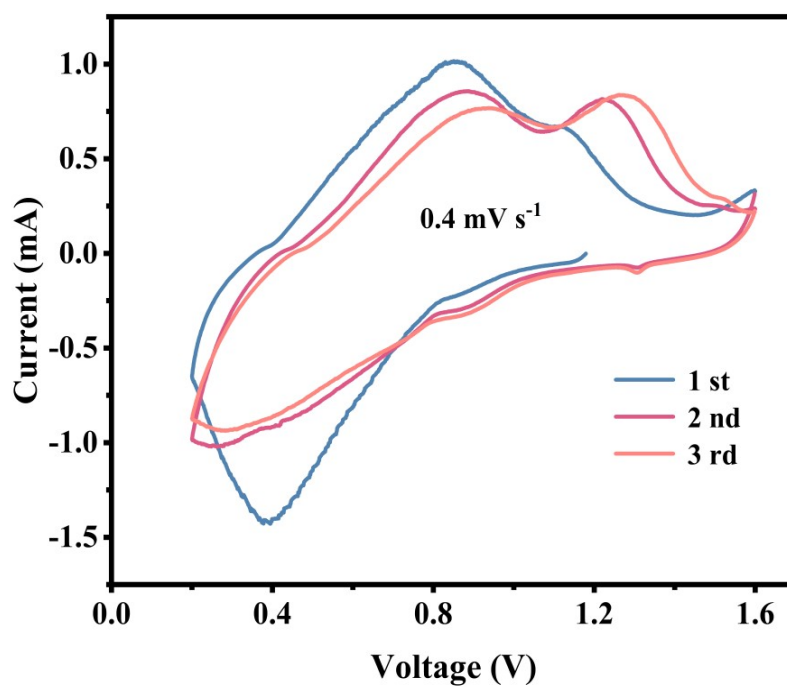

**Figure S4.** CV curves of FeVO-B at  $0.4 \text{ mV s}^{-1}$ .

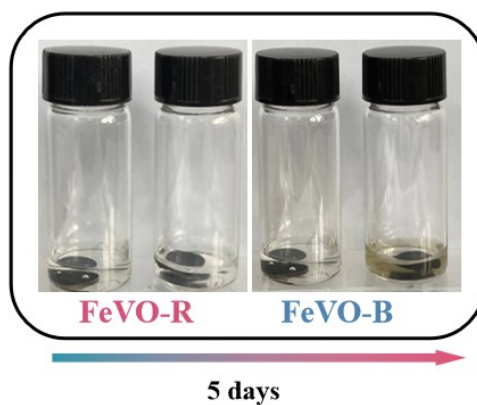

**Figure S5.** Optical images of pristine FeVO-R and FeVO-B electrodes immersed in 2 M  $\text{Zn}(\text{CF}_3\text{SO}_3)_2$  electrolyte for 5d.

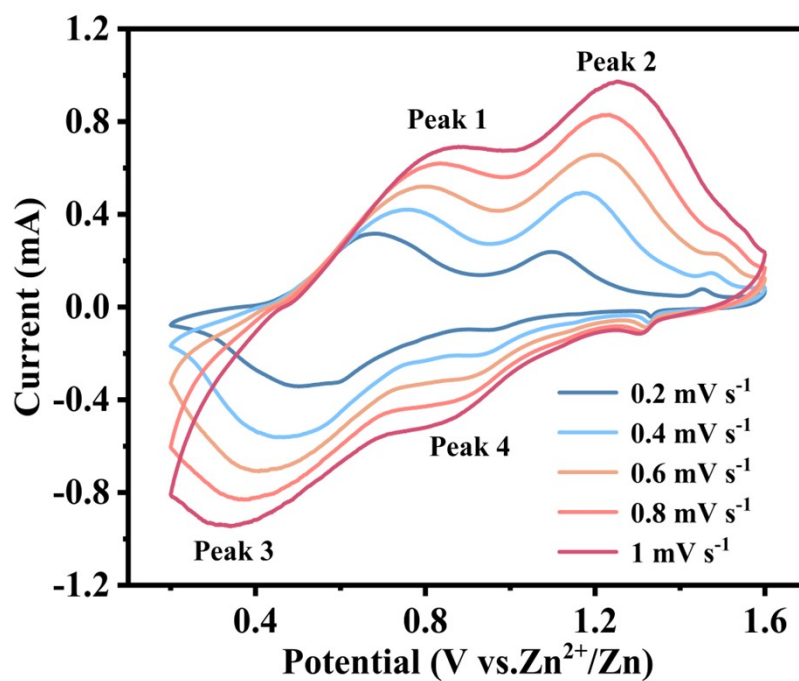

**Figure S6.** CV curves of the FeVO-B at different scan rates.

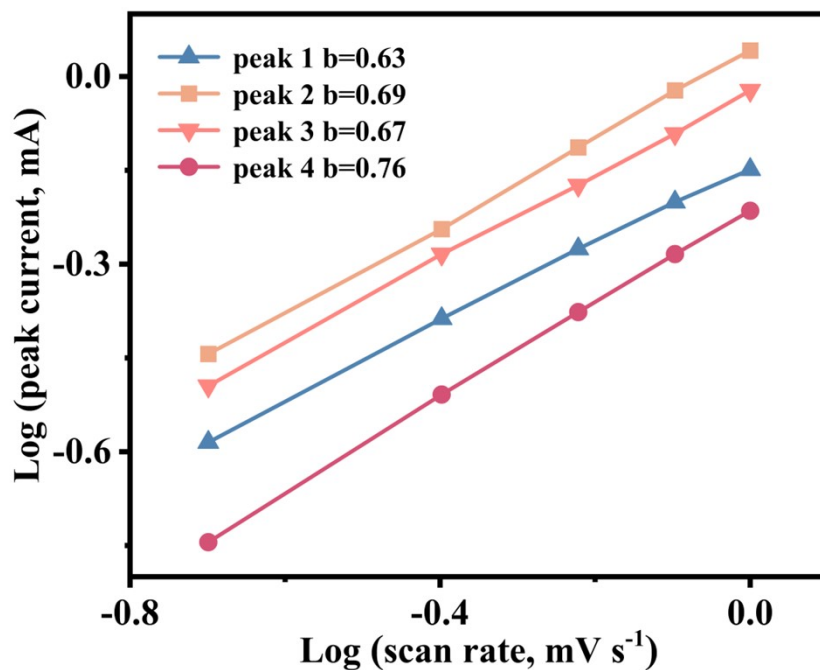

**Figure S7.** Relationship between  $\log i$  and  $\log v$  at specific peak currents for FeVO-B.

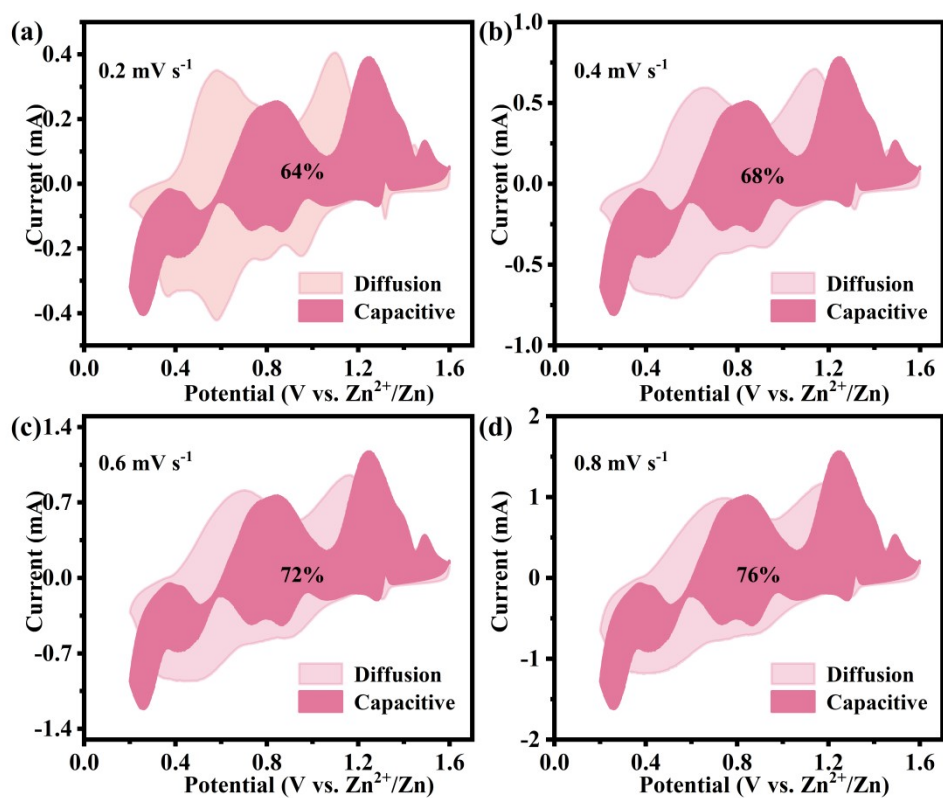

**Figure S8.** Capacitive contribution at (a)  $0.2 \text{ mV s}^{-1}$ , (b)  $0.4 \text{ mV s}^{-1}$ , (c)  $0.6 \text{ mV s}^{-1}$  and (d)  $0.8 \text{ mV s}^{-1}$  for FeVO-R.

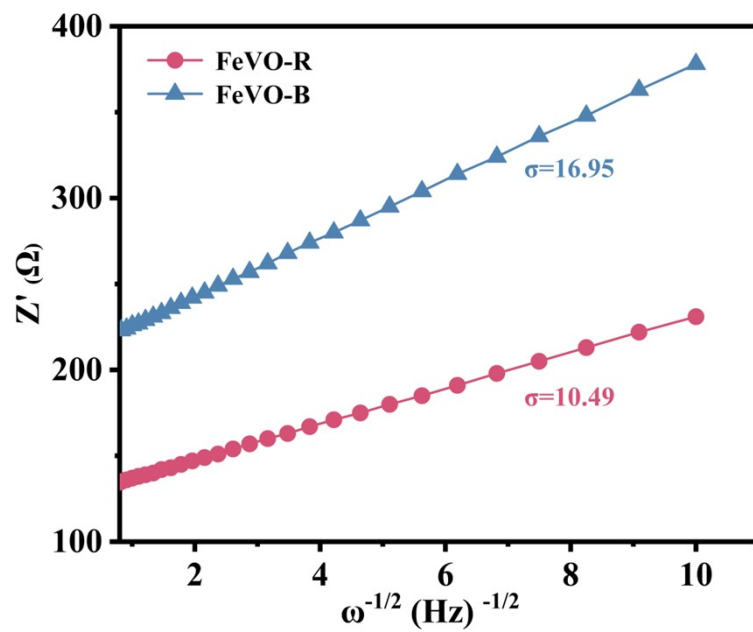

**Figure S9.** Linear relationship between  $Z'$  and  $\omega^{-1/2}$  of FeVO-R and FeVO-B.



### 3. Theoretical calculations

All of the calculations are performed in the framework of the spin-polarized density functional theory with the projector augmented plane-wave method, as implemented in the Vienna ab initio simulation package (VASP) [2,3]. The generalized gradient approximation (GGA) proposed by Perdew, Burke, and Ernzerhof (PBE) is selected for the exchange-correlation potential [4,5]. The long-range van der Waals interaction is described by the DFT-D3 approach [6]. The cut-off energy for plane wave is set to 480 eV. The energy criterion is set to  $10^{-4}$  eV in iterative solution of the Kohn-Sham equation. All the structures are relaxed until the residual forces on the atoms have declined to less than 0.05 eV/Å. Data analysis and visualization are carried out with the help of VASPKIT [7] code and VESTA [8]. The diffusion barrier of adsorbed hydrogen at different adsorption sites were explored by using the Nudge Elastic Band (CI-NEB) method [9].

The adsorption energy  $E_{\text{ads}}$  is expressed as:

$$\Delta E_{\text{ads}} = E_{\text{A+B}} - E_{\text{A}} - E_{\text{B}}$$

where  $E_{\text{A+B}}$  is the total energy of slab A model with B adsorption,  $E_{\text{A}}$  is the energy of a A slab, and  $E_{\text{B}}$  is that for a B molecule.

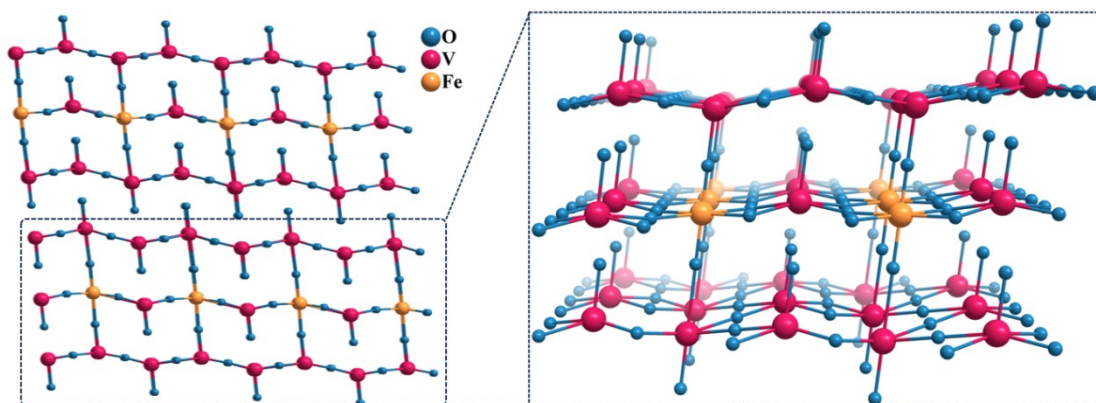

**Figure S10.** Theoretical models of FeVO.

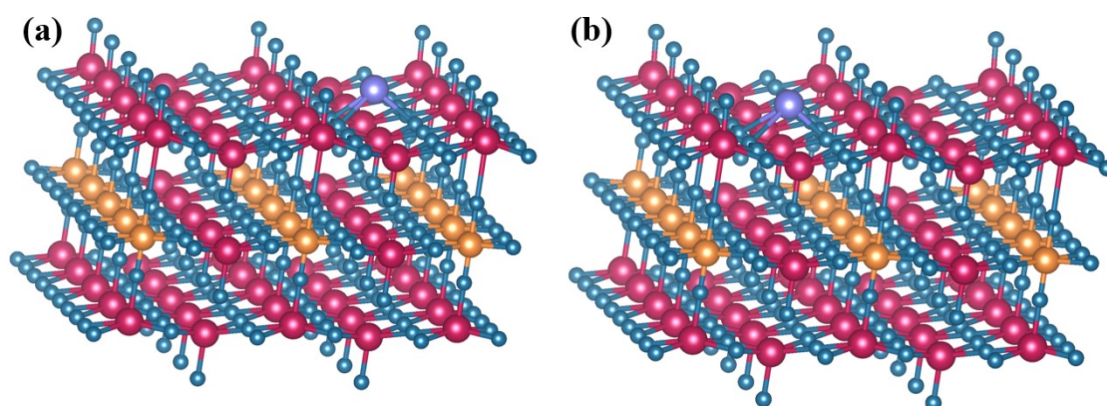

**Figure S11.** Structural diagrams of  $\text{Zn}^{2+}$  adsorbed on FeVO-B (a) and FeVO-R (b) cathodes.

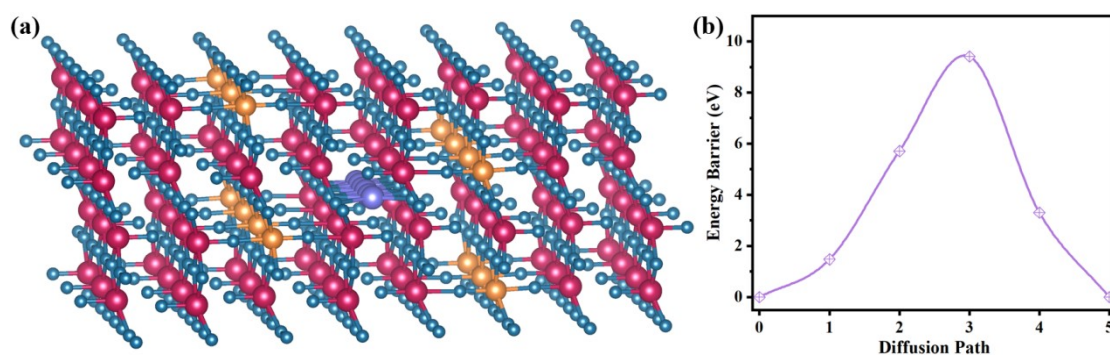

**Figure S12.** The migration pathways for  $\text{Zn}^{2+}$  between layers in FeVO (a) and the corresponding  $\text{Zn}^{2+}$  diffusion barriers (b).

#### 4. Zinc ion storage mechanism

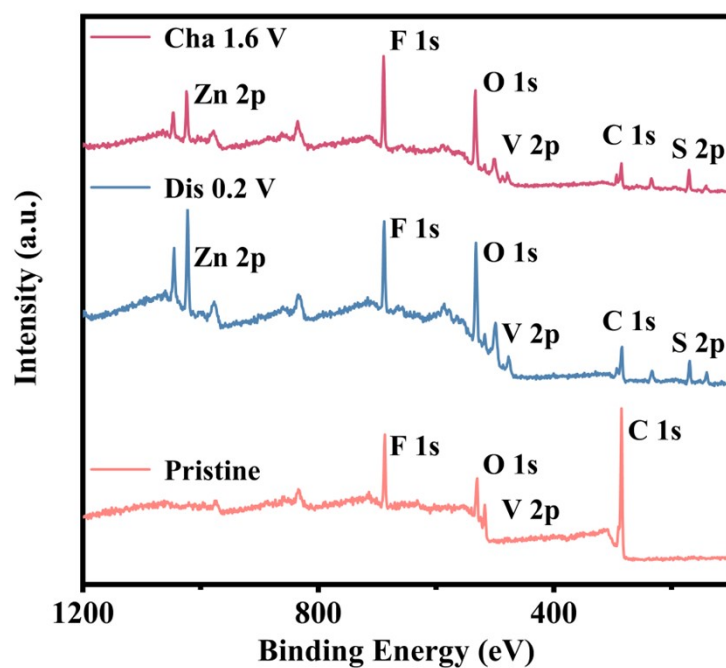

**Figure S13.** All-elements XPS spectra of FeVO-R at different charging and discharging states.

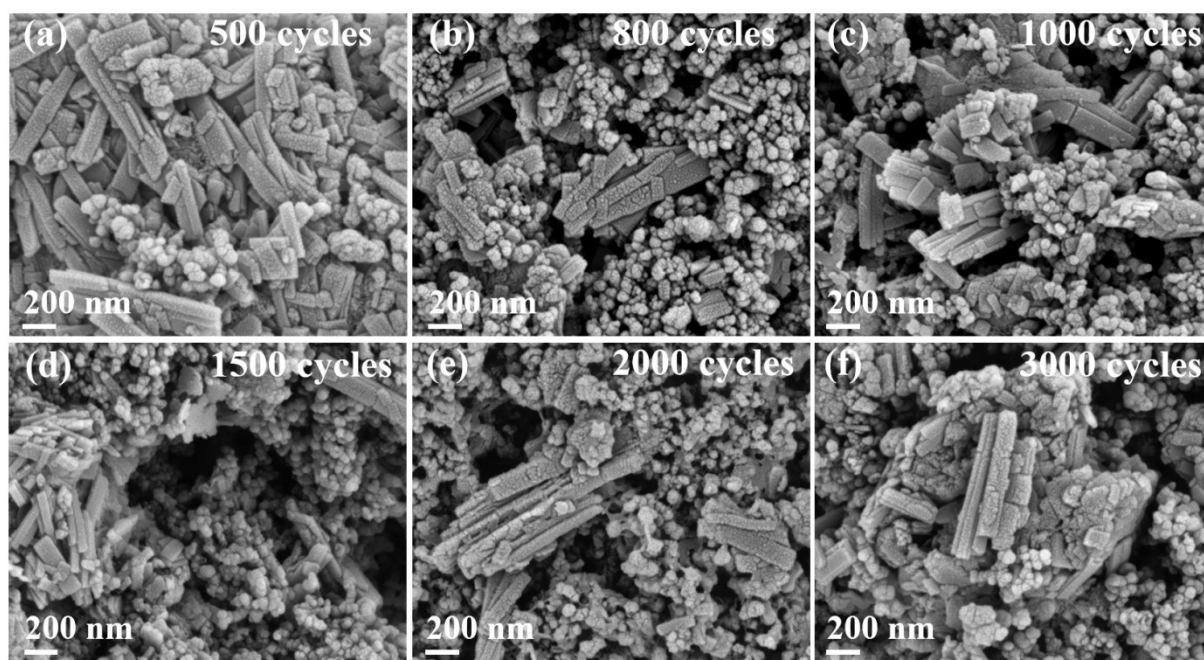

**Figure S14.** SEM images of FeVO-R electrode charged to 1.6 V at 500<sup>th</sup> (a), 800<sup>th</sup> (b), 1000<sup>th</sup> (c), 1500<sup>th</sup> (d), 2000<sup>th</sup> (e), 3000<sup>th</sup> (f) cycles.

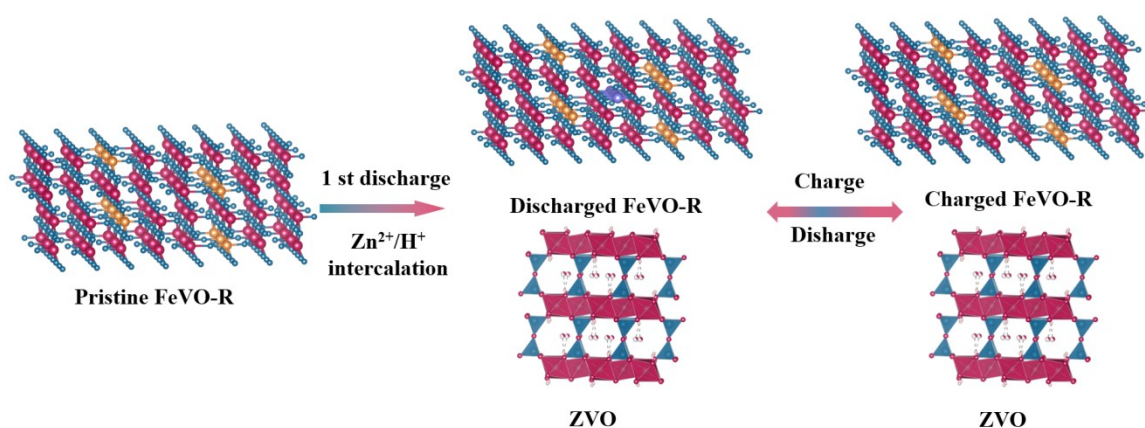

**Figure S15.** Diagram of Zn<sup>2+</sup> ion storage mechanism in FeVO-R.

**Table S1.** Vanadium-based materials used as electrode materials for zinc-ion batteries.

| Electrode materials                                     | Capacity                      |                               |                               |                               | Ref        |
|---------------------------------------------------------|-------------------------------|-------------------------------|-------------------------------|-------------------------------|------------|
|                                                         | 0.1 A g <sup>-1</sup>         | 0.2 A g <sup>-1</sup>         | 0.5 A g <sup>-1</sup>         | 5 A g <sup>-1</sup>           |            |
| <b>This work</b>                                        | <b>409 mAh g<sup>-1</sup></b> | <b>374 mAh g<sup>-1</sup></b> | <b>356 mAh g<sup>-1</sup></b> | <b>208 mAh g<sup>-1</sup></b> |            |
| CS@ZVO                                                  | 323 mAh g <sup>-1</sup>       | 278 mAh g <sup>-1</sup>       | 242 mAh g <sup>-1</sup>       | 97 mAh g <sup>-1</sup>        | <b>S10</b> |
| Ag <sub>2</sub> V <sub>4</sub> O <sub>11</sub>          | /                             | 210 mAh g <sup>-1</sup>       | 182 mAh g <sup>-1</sup>       | 111 mAh g <sup>-1</sup>       | <b>S11</b> |
| VN <sub>x</sub> O <sub>y</sub>                          | 310 mAh g <sup>-1</sup>       | 291 mAh g <sup>-1</sup>       | 276 mAh g <sup>-1</sup>       | 204 mAh g <sup>-1</sup>       | <b>S12</b> |
| O <sub>v</sub> -ZVO                                     | 402 mAh g <sup>-1</sup>       | 365 mAh g <sup>-1</sup>       | 345 mAh g <sup>-1</sup>       | /                             | <b>S13</b> |
| K <sub>0.5</sub> VOPO <sub>4</sub> ·1.5H <sub>2</sub> O | 181 mAh g <sup>-1</sup>       | 166 mAh g <sup>-1</sup>       | 151 mAh g <sup>-1</sup>       | 107 mAh g <sup>-1</sup>       | <b>S14</b> |
| V <sub>2</sub> O <sub>5</sub> @PEDOT                    | 293 mAh g <sup>-1</sup>       | /                             | 224 mAh g <sup>-1</sup>       | 110 mAh g <sup>-1</sup>       | <b>S15</b> |
| VO@pAP                                                  | 383 mAh g <sup>-1</sup>       | 331 mAh g <sup>-1</sup>       | 276 mAh g <sup>-1</sup>       | 139 mAh g <sup>-1</sup>       | <b>S16</b> |

## References

- [1] F.-C. Shen, C. Guo, S.-N. Sun, Z. Lei, Y.-Q. Lan, Self-Sacrificing Template of the POMs-Based Composite for the High-Performance Organic–Inorganic Hybrid Cathode of Lithium-Ion Batteries, *Inorg. Chem*, 61 (2022) 11182-11188.
- [2] Kresse, G. & Hafner, J. Ab initio molecular dynamics for open-shell transition metals. *Phys. Rev. B*, 48 (1993) 13115-13118.
- [3] Kresse, G. F. I., J. Efficient iterative schemes for ab initio total-energy calculations using a plane-wave basis set. *Phys. Rev. B*, 54 (1996) 169-185.
- [4] John P. Perdew, K. B., and Matthias Ernzerhof. Generalized gradient approximation made simple. *Phys. Rev. Lett*, 77 (1996) 3865.
- [5] Kohn, W. & Sham, L. J. Self-Consistent Equations Including Exchange and Correlation Effects. *Phys. Rev*, 140 (1965) A1133-A1138.
- [6] Grimme, S., Antony, J., Ehrlich, S. & Krieg, H. A consistent and accurate ab initio parametrization of density functional dispersion correction (DFT-D) for the 94 elements H-Pu. *J. Chem. Phys*, 132 (2010) 154104.
- [7] Wang, V., Xu, N., Liu, J.-C., Tang, G. & Geng, W.-T. VASPKIT: A user-friendly interface facilitating high-throughput computing and analysis using VASP code. *Comput. Phys. Commun*, 267 (2021) 108033.
- [8] Momma, K. & Izumi, F. VESTA: a three-dimensional visualization system for electronic and structural analysis. *J. Appl. Crystallogr*, 41 (2008) 653-658.

- [9] Henkelman G, Uberuaga B P, Jónsson H. A climbing image nudged elastic band method for finding saddle points and minimum energy paths. *J. Chem. phys*, 113 (2000) 9901-9904.
- [10] J. Yang, J. Li, Y. Li, Z. Wang, L. Ma, W. Mai, M. Xu, L. Pan, Defect regulation in bimetallic oxide cathodes for significantly improving the performance of flexible aqueous Zn-ion batteries, *Chem. Eng. J*, 468 (2023) 143600.
- [11] Q. Li, Y. Liu, K. Ma, G. Yang, C. Wang, In Situ Ag Nanoparticles Reinforced Pseudo-Zn-Air Reaction Boosting  $\text{Ag}_2\text{V}_4\text{O}_{11}$  as High-Performance Cathode Material for Aqueous Zinc-Ion Batteries, *Small Methods* 3 (2019) 1900637.
- [12] X. Xie, G. Fang, W. Xu, J. Li, M. Long, S. Liang, G. Cao, A. Pan, In Situ Defect Induction in Close-Packed Lattice Plane for the Efficient Zinc Ion Storage, *Small* 17 (2021) 2101944.
- [13] J.J. Ye, P.H. Li, H.R. Zhang, Z.Y. Song, T. Fan, W. Zhang, J. Tian, T. Huang, Y. Qian, Z. Hou, N. Shpigel, L.F. Chen, S.X. Dou, Manipulating Oxygen Vacancies to Spur Ion Kinetics in  $\text{V}_2\text{O}_5$  Structures for Superior Aqueous Zinc-Ion Batteries, *Adv. Funct. Mater*, 33 (2023) 2305659.
- [14] L. Wang, M. Zhao, X. Zhang, M. Wu, Y. Zong, Y. Chen, X. Huang, M. Xing, X. Ning, W. Wen, D. Zhu, X. Ren, Novel high-voltage cathode for aqueous zinc ion batteries: Porous  $\text{K}_{0.5}\text{VOPO}_4 \cdot 1.5\text{H}_2\text{O}$  with reversible solid-solution intercalation and conversion storage mechanism, *J. Energy Chem*, 93 (2024) 71-78.

- [15]T. Yang, D. Xin, N. Zhang, J. Li, X. Zhang, L. Dang, Q. Li, J. Sun, X. He, R. Jiang, Z. Liu, Z. Lei, Interfacial polymerization of PEDOT sheath on V<sub>2</sub>O<sub>5</sub> nanowires for stable aqueous zinc ion storage, *J. Mater. Chem. A*, 12 (2024) 10137-10147.
- [16]Z. Song, Y. Zhao, A. Zhou, H. Wang, X. Jin, Y. Huang, L. Li, F. Wu, R. Chen, Organic Intercalation Induced Kinetic Enhancement of Vanadium Oxide Cathodes for Ultrahigh-Loading Aqueous Zinc-Ion Batteries, *Small* 20 (2023) 2305030.
